# Supplementary material
Source: Research Square preprint supplement (doi:10.21203/rs.3.rs-9218650/v1)
Supplement: Supplementary file 1 [file 9df06032f5d5ed192011973b.docx]

**Supplementary Materials**

**Figure S1.** Variable importance ranked using the Boruta algorithm.

**Figure S2.** LASSO regression analysis for feature selection.

**Figure S 3.** Variance inflation factor (VIF) analysis.

**Figure S4.** SHAP plots of feature contributions to the 28-day mortality prediction model. (A) Representative true negative case. (B) Representative true positive case.

**Figure S5**. Partial dependence plots of the model based on SHAP for the top nine features.


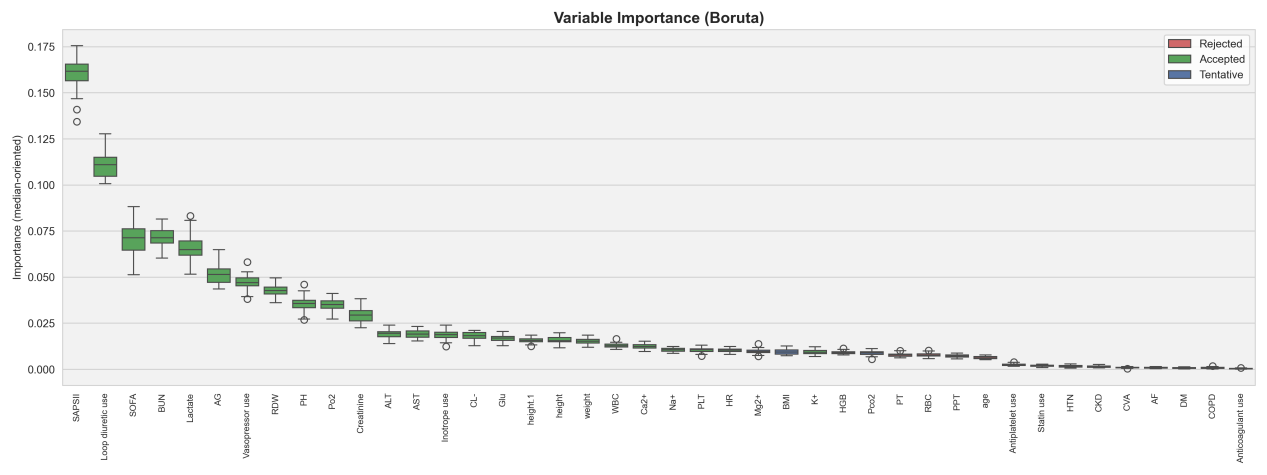
**Figure S1.** Variable importance ranked using the Boruta algorithm.


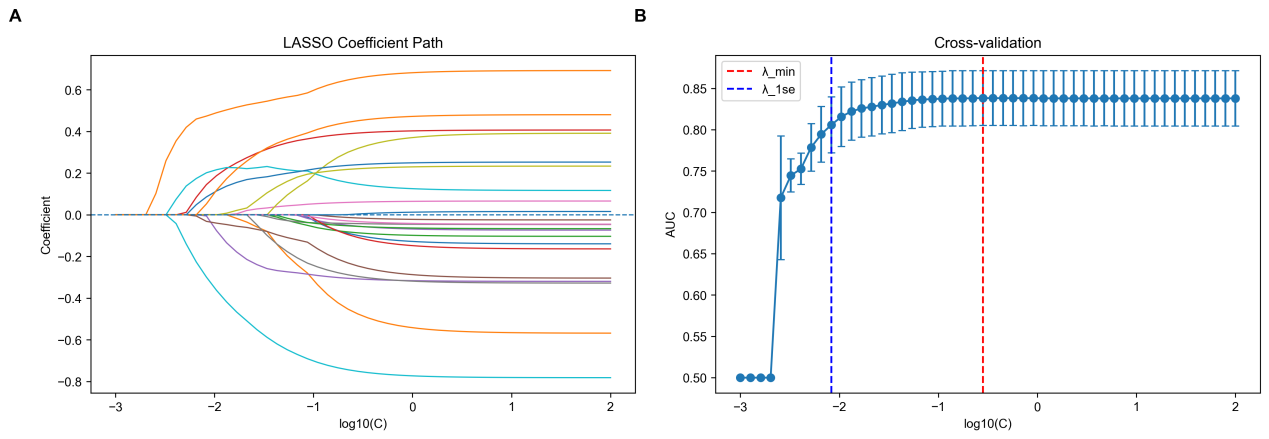


**Figure S2.** LASSO regression analysis for feature selection.


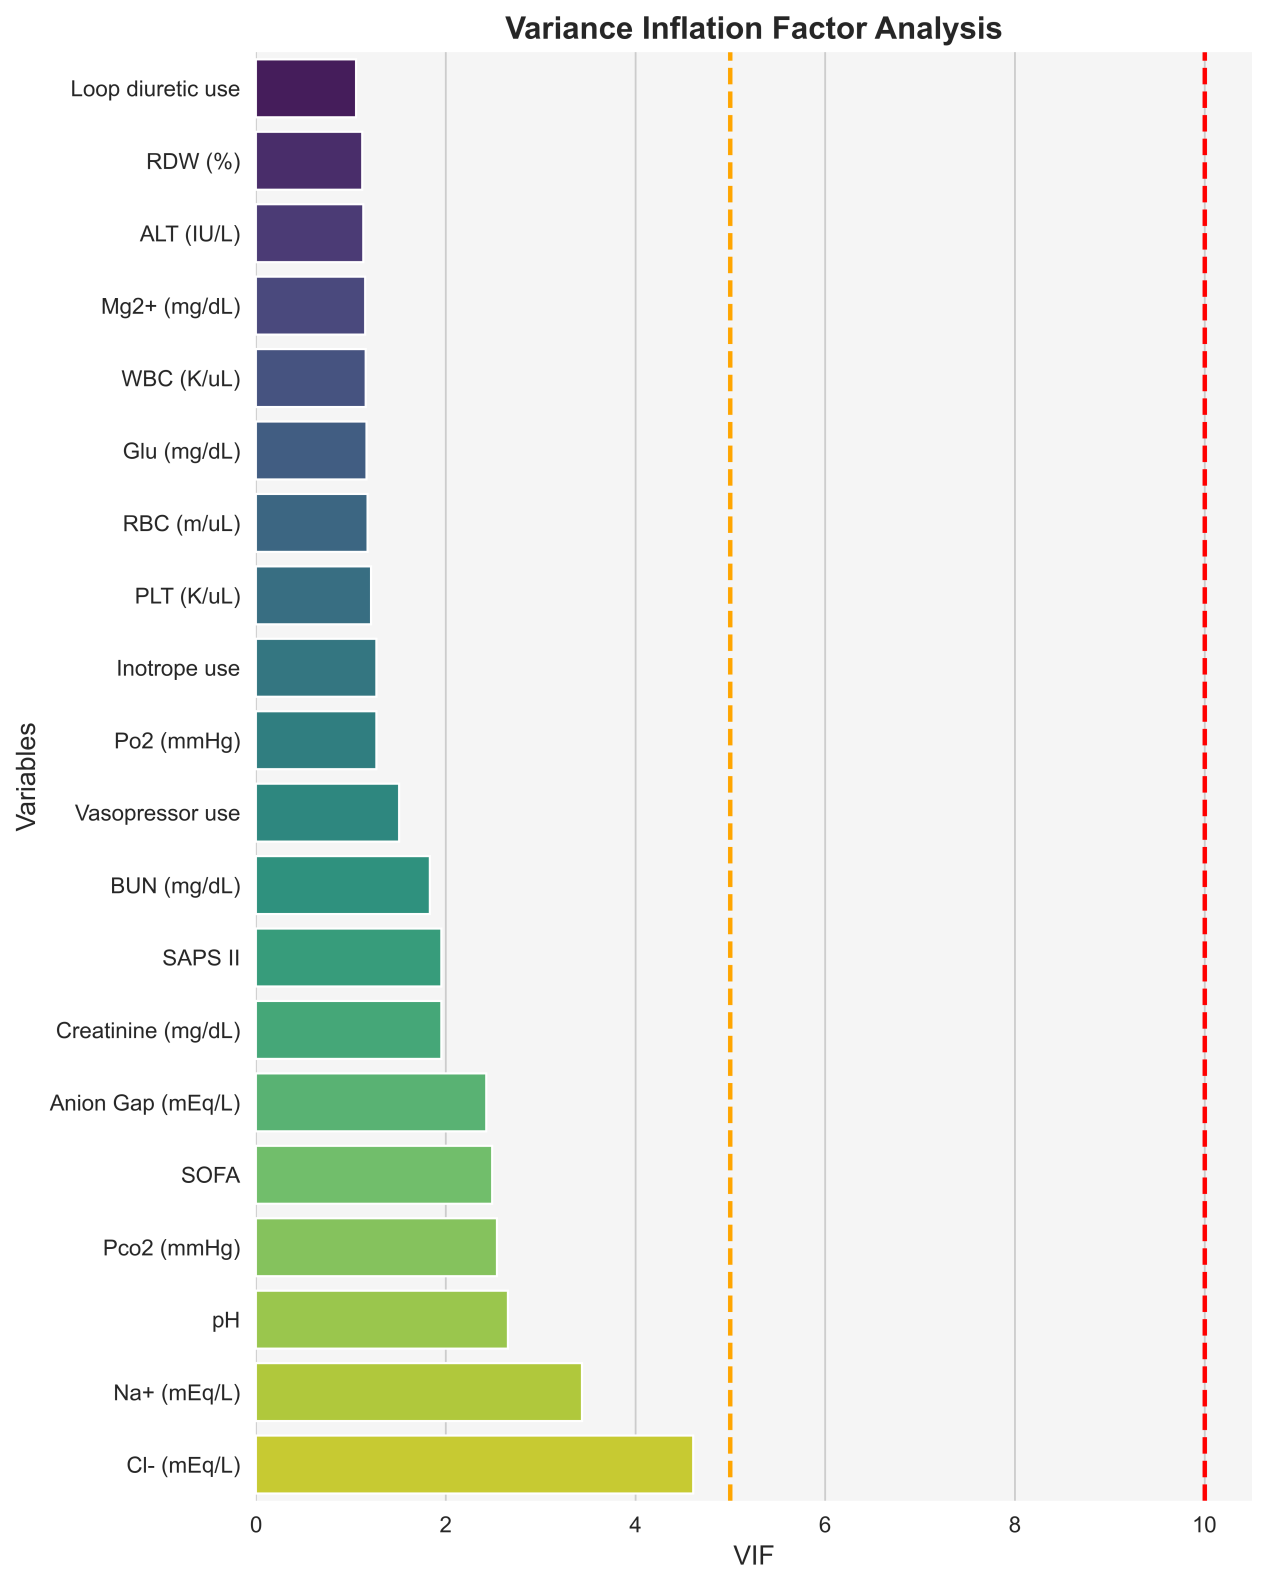


**Figure S 3.** Variance inflation factor (VIF) analysis.


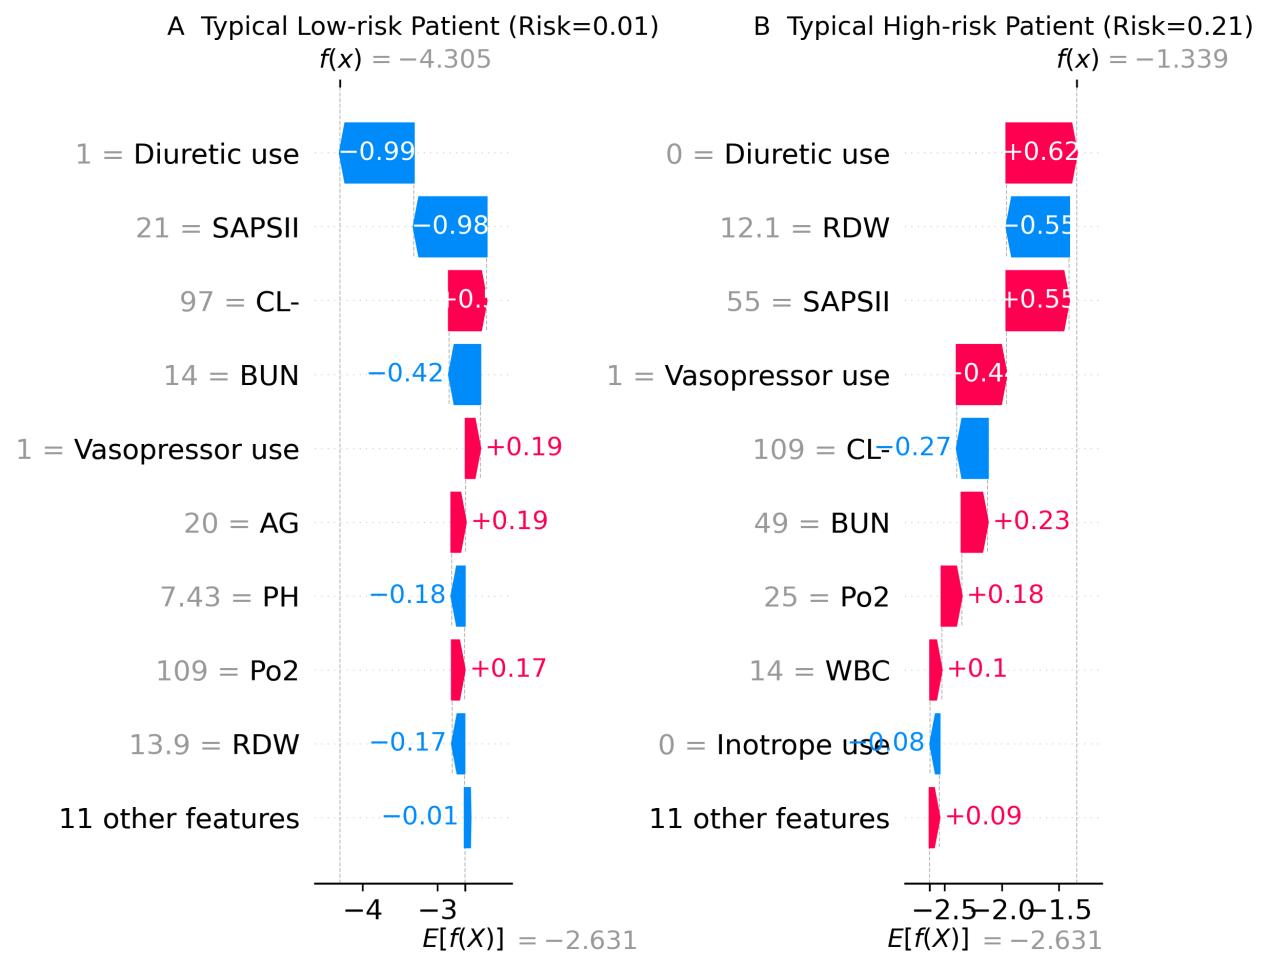


**Figure S4.** SHAP plots of feature contributions to the 28-day mortality prediction model. (A) Representative true negative case. (B) Representative true positive case.


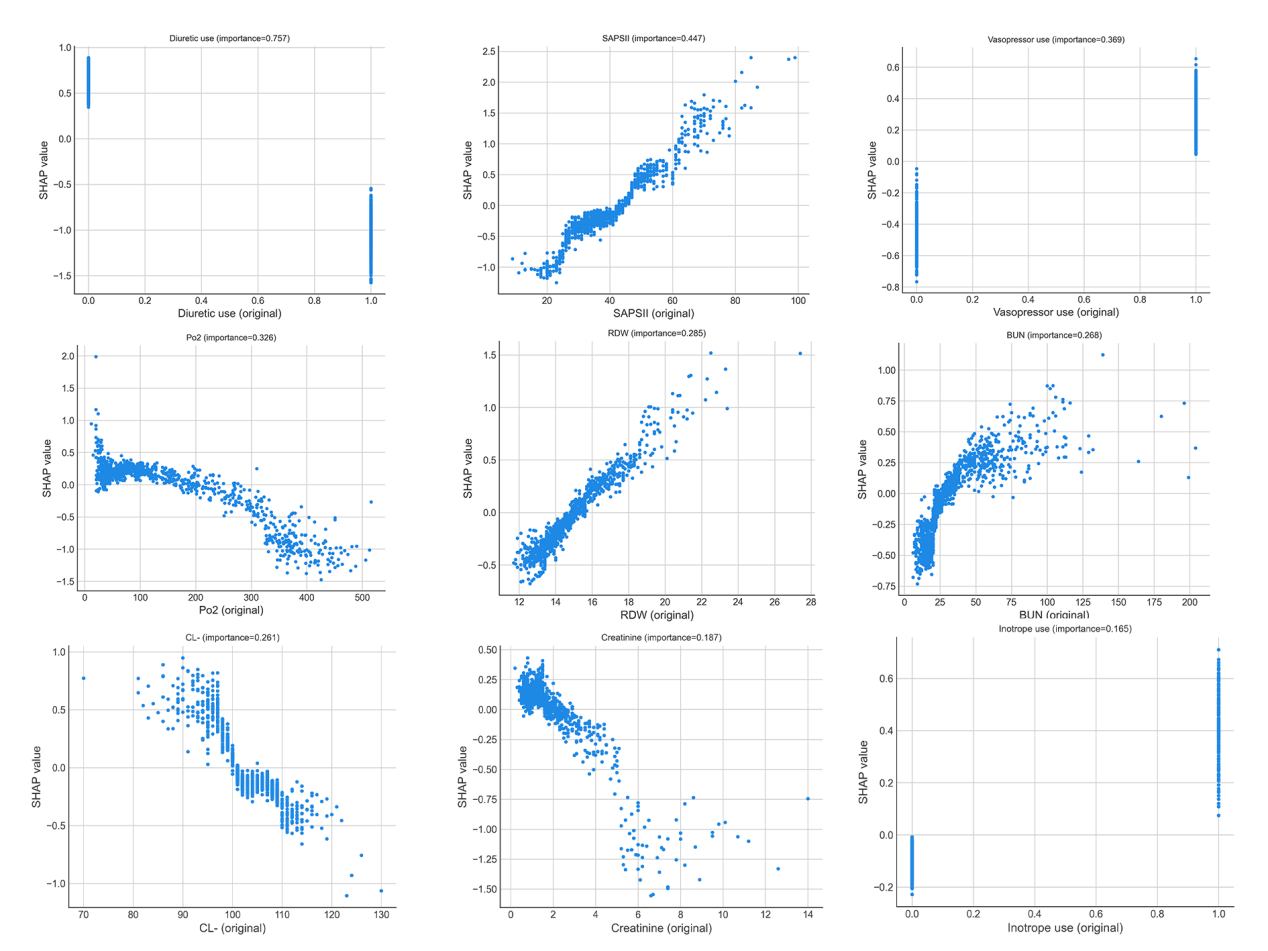


**Figure S5**. Partial dependence plots of the model based on SHAP for the top nine features.
